# Supplementary material for: RNA processing errors triggered by cadmium and integrator complex disruption are signals for environmental stress
Source: PubMed Central journal article supplement (PMC6631800; doi:10.1186/s12915-019-0675-z), 2019-07-16

# A

## NUMR-1

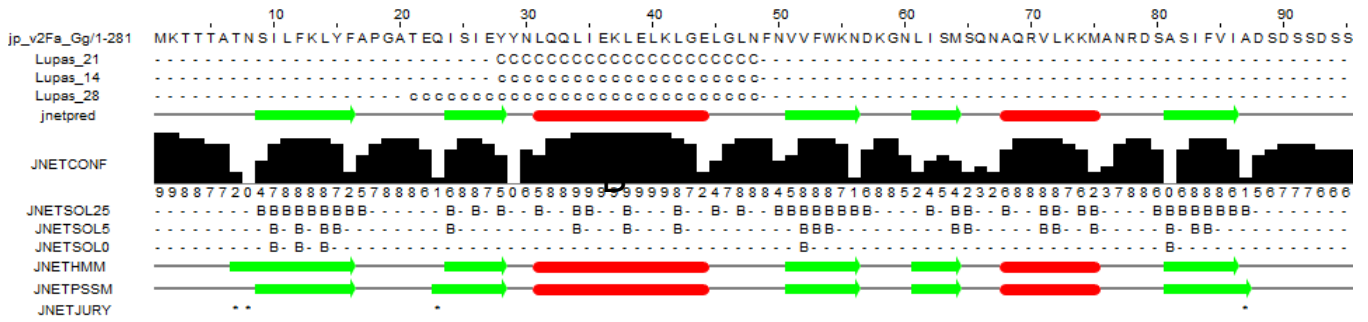

## SRSF2 serine and arginine rich splicing factor 2

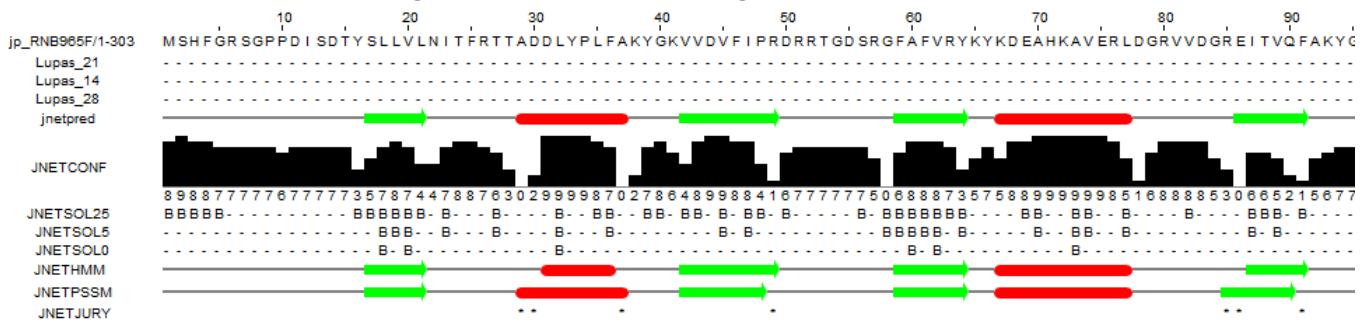

The annotation bars below the alignment are as follows:

- Lupas\_21, Lupas\_14, Lupas\_28

Coiled-coil predictions for the sequence. These are binary predictions for each location.

- JNetPRED

The consensus prediction - helices are marked as red tubes, and sheets as dark green arrows.

- JNetCONF

The confidence estimate for the prediction. High values mean high confidence. prediction - helices are marked as red tubes, and sheets as dark green arrows.

- JNetHMM

HMM profile based prediction - helices are marked as red tubes, and sheets as dark green arrows.

- JNETPSSM

PSSM based prediction - helices are marked as red tubes, and sheets as dark green arrows.

- JNETJURY

A "" in this annotation indicates that the JNETJURY was invoked to rationalize significantly different primary predictions.

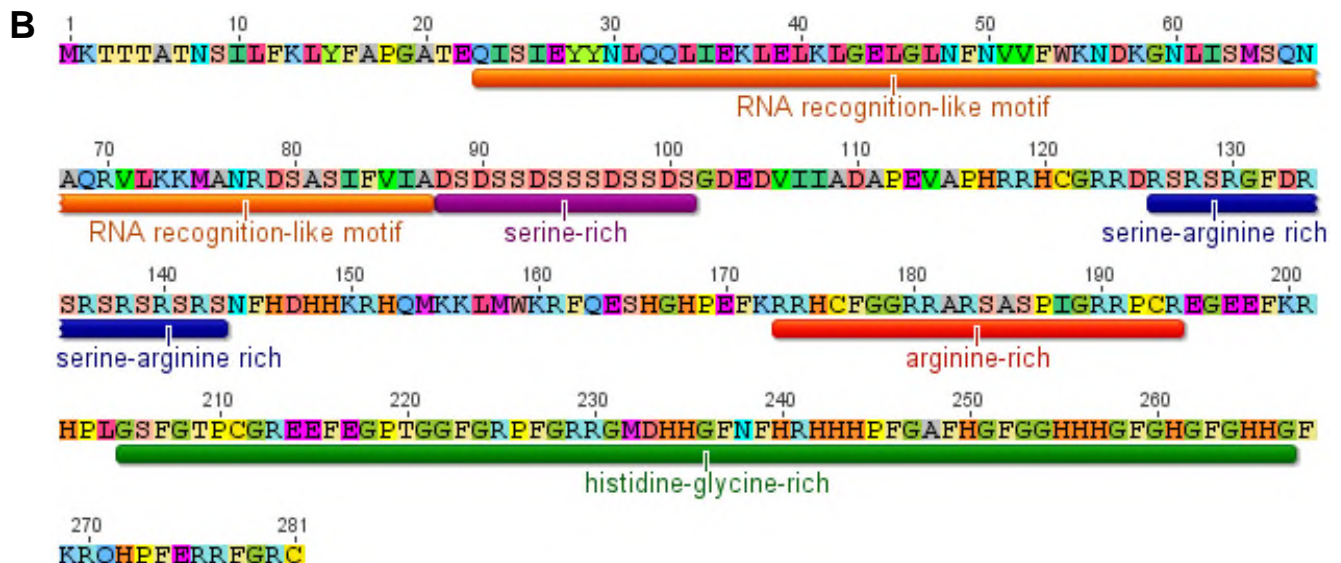

Supplement: 12915_2019_675_MOESM1_ESM.pdf [file 12915_2019_675_MOESM1_ESM.pdf]
